# Supplementary material for: The Extracellular Vesicles Proteome of Endometrial Cells Simulating the Receptive Menstrual Phase Differs from That of Endometrial Cells Simulating the Non-Receptive Menstrual Phase
Source: MDPI journal article supplement (doi:10.3390/biom13020279), 2023-02-02
Supplement: s1 [file s1]

# Supplementary Materials

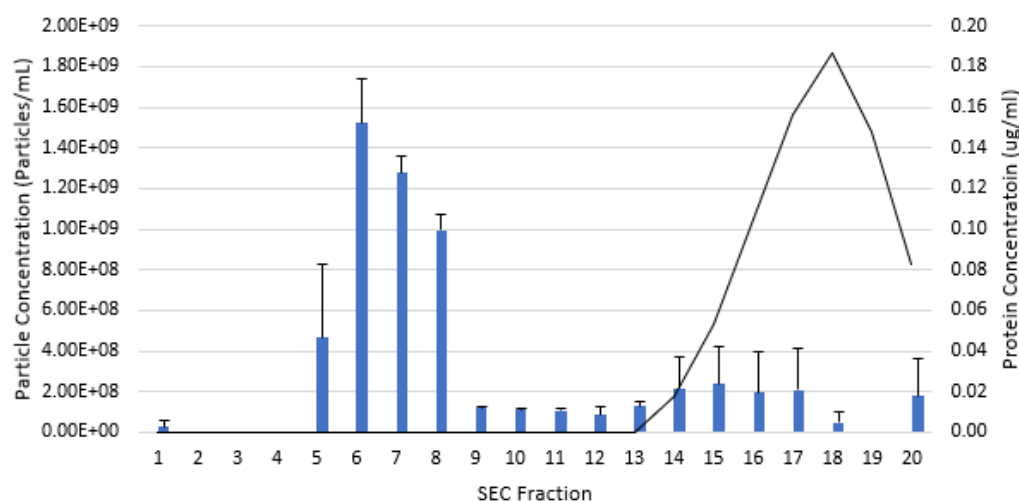

**Figure S1.** Isolation of extracellular vesicles sized particles secreted by the endometrial cell line RL95-2 using differential centrifugation and size exclusion chromatography. The height of the bars represents the mean concentration (particles/mL) of EVs from three biological replicates. The majority of EVs sized particles were eluted in fractions 5–8. The line graph represents the mean concentration of protein (mg/mL) in each SEC fraction from three biological replicates. Error bars represent the standard error from the mean.

**Table S1.** Differential enrichment of EV proteins of E2P4 Group compared to E2. Protein identified in EVs released from estrogen- plus progesterone-treated RL95-2 cells to estrogen-treated RL95-2 cells.

| Uniport Accession | Gene Name  | Adjusted <i>p</i> Value | Fold Change |
|-------------------|------------|-------------------------|-------------|
| A0A494C0G8        | SCLT1      | 1.25x10 <sup>-6</sup>   | -7.18       |
| F1N0X6            | TLL1       | 0.00812                 | -4.13       |
| Q148H7            | KRT79      | 0.0257                  | -4.09       |
| A0A0B4J231        | IGLL5      | 6.93x10 <sup>-5</sup>   | -3.88       |
| A0A286YFY1        | IGHA1      | 0.00132                 | -3.59       |
| Q96GE4            | CEP95      | 0.0334                  | -3.36       |
| F1MBG0            | CARM1      | 0.00067                 | -3.29       |
| P11215            | ITGAM      | 0.0409                  | -3.24       |
| Q95114            | MFGE8.1    | 0.0437                  | -3.13       |
| A0A3Q1N1J8        | NCAM1      | 0.0388                  | -3.08       |
| A0A3Q1LPG0        | A0A3Q1LPG0 | 0.0112                  | -2.82       |
| A7YW98            | RARS1.1    | 0.00077                 | -2.53       |
| P40926            | MDH2       | 0.00076                 | -2.49       |
| Q14393-5          | GAS6       | 0.0345                  | -2.09       |
| P18065            | IGFBP2     | 0.0372                  | -2.07       |
| H7BYW6            | PDGFA      | 0.0352                  | -1.85       |
| F1MM32            | QSOX1.1    | 2.18x10 <sup>-5</sup>   | -1.81       |
| O00151            | PDLIM1     | 0.048                   | -1.34       |
| E9PEX6            | DLD        | 0.0367                  | -1.31       |
| A0A3Q1M688        | NDST1      | 0.0262                  | -1.28       |
| Q8N474            | SFRP1      | 0.0377                  | -1.15       |
| D6RHI9            | RNASET2    | 0.0423                  | -1.14       |
| F5GY03            | SPARC      | 0.0108                  | -1.11       |
| Q99523            | SORT1      | 0.0345                  | 1.15        |

|            |           |                       |      |
|------------|-----------|-----------------------|------|
| P17174     | GOT1      | 0.0018                | 1.24 |
| Q2TV78-2   | MST1L     | 0.00107               | 1.24 |
| A0A3Q1MNL9 | TGFBI     | 0.0424                | 1.3  |
| Q17QQ1     | LAMTOR3   | 0.045                 | 1.31 |
| P19858     | LDHA.1    | 0.0277                | 1.51 |
| A0A3Q1N7H1 | CYRIB     | 0.0317                | 1.53 |
| Q3SZF2     | ARF4.1    | 0.04                  | 1.55 |
| H7BZJ3     | PDIA3.1   | 0.0277                | 1.69 |
| E9PAM4     | PI4K2A    | 0.0367                | 1.81 |
| Q9NRN7     | AASDHPPT  | 0.0231                | 1.86 |
| A6QLB3     | ITGA2B    | 0.0406                | 1.86 |
| O75223     | GGCT      | 0.0362                | 1.88 |
| A0A3Q1LMU4 | INHBB     | 0.0451                | 1.88 |
| Q13564-3   | NAE1      | 0.00023               | 1.88 |
| P00750     | PLAT      | 0.026                 | 1.91 |
| A0A452DJE0 | ACE2      | 0.0394                | 1.95 |
| C9JPV1     | SLC6A6    | 0.0256                | 2.03 |
| Q58D84     | FSTL1.1   | 0.00488               | 2.2  |
| P25205     | MCM3      | 0.00115               | 2.25 |
| Q86W42     | THOC6     | 0.00806               | 2.28 |
| A0A087WXT3 | ZNF33B    | 0.0408                | 2.32 |
| A0A087WYV6 | TSPAN6    | 0.00054               | 2.56 |
| Q6URK6     | CDH5      | 0.0369                | 2.71 |
| F1N672     | TM9SF2    | 0.0266                | 2.75 |
| B4DZG7     | ARL1      | 0.0398                | 2.83 |
| Q53GA4     | PHLDA2    | 0.00138               | 3.1  |
| Q3ZC83     | SLC29A1.1 | 0.00147               | 3.16 |
| A6QP90     | KRT32.1   | 0.00142               | 3.19 |
| P04066     | FUCA1     | 2.81×10 <sup>-8</sup> | 3.22 |
| A0A3Q1M5K6 | ITGB5.1   | 0.0168                | 3.53 |
| Q15223     | NECTIN1   | 0.0316                | 3.68 |
| A0A452DJ21 | EIF4E     | 0.0265                | 3.83 |
| F1MER7     | HSPG2.1   | 0.0246                | 3.83 |
| F6RAG5     | KIF5C     | 0.0315                | 3.97 |
| Q148I8     | KRT31     | 0.0246                | 5.61 |
| H7C2G2     | ART4      | 0.00122               | 7.2  |

**Table S2.** Differential enrichment of EV proteins of E2P4 Group compared to P4. Protein identified in EVs released from estrogen plus progesterone-treated RL95-2 compared to progesterone-treated RL95-2 cells.

| Uniport Accession | Gene Name  | Adjusted <i>p</i> Value | Fold Change |
|-------------------|------------|-------------------------|-------------|
| A0A3Q1M4Y2        | CFAP57     | 0.00141                 | −5.74       |
| Q5VUV5            | CHIA       | 0.00148                 | −4.5        |
| P11215            | ITGAM      | 0.0345                  | −4.06       |
| E5RGX5            | STMN2      | 0.00126                 | −3.47       |
| P14324-2          | FDPS       | 0.0143                  | −3.27       |
| Q14393-5          | GAS6       | 0.0287                  | −2.59       |
| H0Y8K3            | CDV3       | 0.0334                  | −2.29       |
| P02453            | COL1A1     | 0.0372                  | −2.21       |
| Q9H9K5            | ERVMER34-1 | 0.00101                 | −2.02       |
| P51858            | HDGF       | 0.00262                 | −1.9        |

|            |            |          |       |
|------------|------------|----------|-------|
| Q5E998     | CTSV.1     | 0.00149  | −1.76 |
| P02750     | LRG1       | 0.0237   | −1.68 |
| O75509     | TNFRSF21   | 0.0262   | −1.58 |
| O95025     | SEMA3D     | 0.00394  | −1.51 |
| F1MM32     | QSOX1.1    | 0.0177   | −1.43 |
| Q969H8     | MYDGF      | 0.000145 | −1.38 |
| E9PF78     | ADAM22     | 0.00688  | −1.18 |
| F5H6P7     | MAGOHB     | 0.0435   | 1.74  |
| A0A0B4J1W3 | NAA15      | 0.0282   | 1.74  |
| A0A3Q1M315 | LOC790886  | 0.0157   | 1.81  |
| Q9BSJ2-3   | TUBGCP2    | 0.0172   | 1.82  |
| M0R1D6     | DNAJB1     | 0.00332  | 1.99  |
| Q96S59     | RANBP9     | 0.0469   | 2.01  |
| D6RDI2     | LUC7L3     | 0.00952  | 2.06  |
| Q9H6X2-3   | ANTXR1     | 0.000554 | 2.29  |
| Q6B856     | TUBB2B     | 0.00398  | 2.32  |
| K7EK07     | H3-3B      | 0.00328  | 2.76  |
| C9JPH9     | FSCN1      | 0.0311   | 2.98  |
| Q9NX76     | CMTM6      | 0.0126   | 3     |
| A6QP90     | KRT32.1    | 0.00901  | 3.37  |
| F1N2K1     | PCYOX1     | 0.000965 | 3.73  |
| A0A452DJ21 | EIF4E      | 0.0366   | 4.41  |
| Q3ZBX9     | H2AFJ      | 0.0345   | 4.79  |
| A0A3Q1MI29 | A0A3Q1MI29 | 0.00849  | 5.21  |
| A0A3Q1MM65 | RPL4.1     | 0.0392   | 5.4   |

**Table S3.** Differential enrichment of EV proteins of E2 Group compared to P4. Protein identified in EVs released from estrogen plus progesterone-treated RL95-2 compared to control treated RL95-2 cells.

| Uniport Accession | Gene Name  | Adjusted <i>p</i> Value | Fold Change |
|-------------------|------------|-------------------------|-------------|
| H7C2G2            | ART4       | 0.00429                 | −6.23       |
| A0A3Q1M4Y2        | CFAP57     | 0.00000306              | −5.94       |
| Q5VUV5            | CHIA       | 0.0000162               | −4.39       |
| E5RGX5            | STMN2      | 0.0000199               | −3.27       |
| A0A087WTK0        | PTPRJ      | 0.00414                 | −3.18       |
| B5MD17            | CBX1       | 0.00897                 | −3.15       |
| P25205            | MCM3       | 0.000000149             | −3.05       |
| P04066            | FUCA1      | 6.98x10 <sup>−8</sup>   | −2.99       |
| A6QLB3            | ITGA2B     | 0.00116                 | −2.41       |
| A0A087WYV6        | TSPAN6     | 0.000767                | −2.33       |
| A0A087WXT3        | ZNF33B     | 0.043                   | −2.2        |
| Q5SZC9            | ABRACL     | 0.00212                 | −2.01       |
| Q9H9K5            | ERVMER34-1 | 0.00000389              | −1.99       |
| P07954-2          | FH         | 0.0324                  | −1.98       |
| E9PF78            | ADAM22     | 2.34x10 <sup>−11</sup>  | −1.86       |
| P17174            | GOT1       | 4.04x10 <sup>−8</sup>   | −1.84       |
| A0A3Q1LMU4        | INHBB      | 0.0485                  | −1.79       |
| E1BNP7            | TFAP2D     | 0.0455                  | −1.74       |
| H7BZJ3            | PDIA3      | 0.0156                  | −1.69       |
| A0A3Q1N7H1        | CYRIB      | 0.0124                  | −1.6        |
| F1MWN1            | CSE1L      | 0.000909                | −1.46       |

---

|            |            |             |       |
|------------|------------|-------------|-------|
| F5H6E2     | MYO1C      | 0.00519     | −1.46 |
| Q5E998     | CTSV       | 0.000679    | −1.44 |
| Q12805-5   | EFEMP1     | 0.0233      | −1.41 |
| O95025     | SEMA3D     | 0.000326    | −1.39 |
| A0A087WTM1 | ROBO1      | 0.0000191   | −1.27 |
| Q92598-2   | HSPH1      | 0.046       | −1.24 |
| P02750     | LRG1       | 0.0408      | −1.23 |
| Q9UKM7     | MAN1B1     | 0.0387      | −1.02 |
| C9JFR7     | CYCS       | 0.0119      | −1    |
| Q0VD53     | VPS26A     | 0.0157      | 1.01  |
| Q9NYU2-2   | UGGT1      | 0.0201      | 1.13  |
| Q08945     | SSRP1      | 0.0395      | 1.35  |
| O00443     | PIK3C2A    | 0.0186      | 1.37  |
| F1N6D5     | EFTUD2     | 0.012       | 1.4   |
| Q6B856     | TUBB2B     | 0.0425      | 1.44  |
| P68431     | H3C1       | 0.0474      | 1.45  |
| Q5E9X4     | LRRC59     | 0.0173      | 1.61  |
| O97593     | SMC1A      | 0.05        | 1.62  |
| C9J6P4     | ZC3HAV1    | 0.0184      | 1.66  |
| P24627     | LTF        | 0.0386      | 1.67  |
| P40926     | MDH2       | 0.0172      | 1.83  |
| A0A0B4J1W3 | NAA15      | 0.000341    | 1.89  |
| O43765     | SGTA       | 0.0487      | 1.89  |
| H0Y6Z7     | PTPRF      | 0.00948     | 1.95  |
| Q9H6X2-3   | ANTXR1     | 0.0000258   | 1.98  |
| A0A3Q1M315 | LOC790886  | 0.0000318   | 2.05  |
| M0R1D6     | DNAJB1     | 0.0000154   | 2.06  |
| G5E9R5     | ACP1       | 0.0000576   | 2.24  |
| H7C1M2     | SON        | 0.0476      | 2.24  |
| P01833     | PIGR       | 0.0499      | 2.35  |
| F1MBG0     | CARM1      | 0.00819     | 2.58  |
| H7C3P9     | COPS3      | 0.00135     | 2.59  |
| A0A3Q1LPG0 | A0A3Q1LPG0 | 0.00569     | 2.79  |
| Q9NX76     | CMTM6      | 0.00102     | 2.82  |
| F1N2K1     | PCYOX1     | 0.000303    | 3.03  |
| K7EK07     | H3-3B      | 0.00000319  | 3.04  |
| Q96GE4     | CEP95      | 0.0194      | 3.36  |
| P0DPA2     | VSIG8      | 0.0476      | 3.83  |
| A0A494C0G8 | SCLT1      | 0.0195      | 3.98  |
| F1N0X6     | TLL1       | 0.000963    | 4.49  |
| A0A286YFY1 | IGHA1      | 0.000000156 | 4.93  |

---

**Table S4.** Differential enrichment of EV proteins of E2P4 Group compared to C. Protein identified in EVs released from estrogen plus progesterone-treated RL95-2 compared to control treated RL95-2 cells.

| Uniport Accession | Gene Name  | Adjusted <i>p</i> Value | Fold Change |
|-------------------|------------|-------------------------|-------------|
| Q5VSY0-2          | GKAP1      | 9.18E-05                | −5.16       |
| Q5E9M9            | RHOT2      | 0.0327                  | −3.66       |
| E5RGX5            | STMN2      | 0.00314                 | −3.15       |
| A0A3Q1M688        | NDST1      | 1.7E-09                 | −3.02       |
| P14324-2          | FDPS       | 0.0386                  | −2.92       |
| O94985-2          | CLSTN1     | 0.00216                 | −2.69       |
| Q14393-5          | GAS6       | 0.0235                  | −2.63       |
| Q9H9K5            | ERVMER34-1 | 5.35E-06                | −2.42       |
| Q10471            | GALNT2     | 0.0104                  | −2.32       |
| Q56K13            | SF3B5      | 0.05                    | −2.24       |
| O75509            | TNFRSF21   | 0.000117                | −2.22       |
| K7ELL7            | PRKCSH     | 0.0275                  | −2.15       |
| A0A087X0S5        | COL6A1     | 0.00459                 | −2.05       |
| P01024            | C3         | 0.0469                  | −1.89       |
| P51858            | HDGF       | 0.00243                 | −1.87       |
| P13667            | PDIA4      | 0.0232                  | −1.75       |
| A0A3Q1MRC3        | EFNA5      | 0.0138                  | −1.65       |
| F1MM32            | QSOX1      | 0.00365                 | −1.6        |
| Q8N474            | SFRP1      | 0.0252                  | −1.47       |
| Q969H8            | MYDGF      | 5.84E-06                | −1.45       |
| J3KMY5            | NPC2       | 0.0227                  | −1.37       |
| Q9UQ74-2          | PSG8       | 0.0349                  | −1.18       |
| Q13541            | EIF4EBP1   | 0.00552                 | 1.6         |
| Q3SZF2            | ARF4       | 0.026                   | 1.98        |
| P04066            | FUCA1      | 0.000341                | 2.66        |
| E9PS42            | CSRP1      | 0.0156                  | 2.92        |
| O75223            | GGCT       | 0.000052                | 3.46        |
| P01040            | CSTA       | 0.029                   | 3.7         |
| Q9BZJ8            | GPR61      | 0.0459                  | 3.7         |
| P25311            | AZGP1      | 0.0434                  | 3.89        |
| A0A3Q1MM65        | RPL4       | 0.000453                | 7.45        |

**Table S5.** Differential enrichment of EV proteins of E2 Group compared to C. Protein identified in EVs released from estrogen treated RL95-2 compared to control treated RL95-2 cells.

| Uniport Accession | Gene Name | Adjusted <i>p</i> Value | Fold Change |
|-------------------|-----------|-------------------------|-------------|
| Q5VSY0-2          | GKAP1     | 0.0000202               | −5.16       |
| Q2KIX7            | Q2KIX7    | 0.00118                 | −4.27       |
| F1MER7            | HSPG2     | 0.042                   | −3.93       |
| Q14574            | DSC3      | 0.0313                  | −3.46       |
| Q86SQ4-2          | ADGRG6    | 0.000284                | −3.16       |
| A6QLB3            | ITGA2B    | 0.000198                | −3.1        |
| P25205            | MCM3      | 0.0000168               | −3.01       |
| E5RGX5            | STMN2     | 0.00278                 | −2.95       |
| F1N672            | TM9SF2    | 0.0344                  | −2.94       |
| A0A3Q1NFD1        | CACNA2D1  | 0.00319                 | −2.8        |
| Q3ZC83            | SLC29A1.1 | 0.0417                  | −2.61       |
| Q53GA4            | PHLDA2    | 0.0432                  | −2.53       |

|            |            |            |       |
|------------|------------|------------|-------|
| G3N1U4     | SERPINA3-3 | 0.05       | −2.52 |
| Q9H9K5     | ERVMER34-1 | 0.00000159 | −2.39 |
| P00750     | PLAT       | 0.0105     | −2.28 |
| Q10471     | GALNT2     | 0.00937    | −2.16 |
| E9PB61     | ALYREF     | 0.0373     | −2.15 |
| Q58D84     | FSTL1      | 0.0491     | −1.91 |
| A0A087WYV6 | TSPAN6     | 0.0474     | −1.91 |
| P19858     | LDHA       | 0.0067     | −1.89 |
| P13667     | PDIA4      | 0.00346    | −1.89 |
| A0A0G2JP90 | NOMO1      | 0.0441     | −1.85 |
| F1MGE9     | HYPK       | 0.0282     | −1.79 |
| P01024     | C3         | 0.043      | −1.76 |
| A0A3Q1MNL9 | TGFBI      | 0.00755    | −1.75 |
| A0A3Q1M688 | NDST1      | 0.00194    | −1.74 |
| E9PF78     | ADAM22     | 0.00000159 | −1.63 |
| P17174     | GOT1       | 0.00091    | −1.43 |
| Q99523     | SORT1      | 0.0409     | −1.25 |
| K7ENJ4     | ATP5F1A    | 0.00908    | 2.11  |
| E9PS42     | CSRP1      | 0.0429     | 2.4   |
| P40926     | MDH2       | 0.000109   | 2.99  |
| P12273     | PIP        | 0.0271     | 3.26  |
| Q6UWP8     | SBSN       | 0.0443     | 3.58  |
| P25311     | AZGP1      | 0.0372     | 3.65  |
| A0A0B4J231 | IGLL5      | 0.000862   | 3.68  |
| P31025     | LCN1       | 0.023      | 4.05  |
| A0A286YFY1 | IGHA1      | 0.000264   | 4.31  |
| F1N0X6     | TLL1       | 0.0135     | 4.32  |
| A0A494C0G8 | SCLT1      | 0.0221     | 4.64  |
| A0A3Q1MM65 | RPL4       | 0.0171     | 5.44  |

**Table S6.** Differential enrichment of EV proteins of P4 Group compared to C. Protein identified in EVs released from progesterone treated RL95-2 compared to control treated RL95-2 cells.

| Uniport Accession | Gene Name | Adjusted <i>p</i> Value | Fold Change |
|-------------------|-----------|-------------------------|-------------|
| F1N2K1            | PCYOX1    | 0.0186                  | −3.98       |
| Q9H6X2-3          | ANTXR1    | 0.0311                  | −2.13       |
| A0A3Q1M688        | NDST1     | 0.032                   | −1.97       |
| Q13162            | PRDX4     | 0.0457                  | −1.18       |
| A0A3Q1M4Y2        | CFAP57    | 0.028                   | 6.03        |

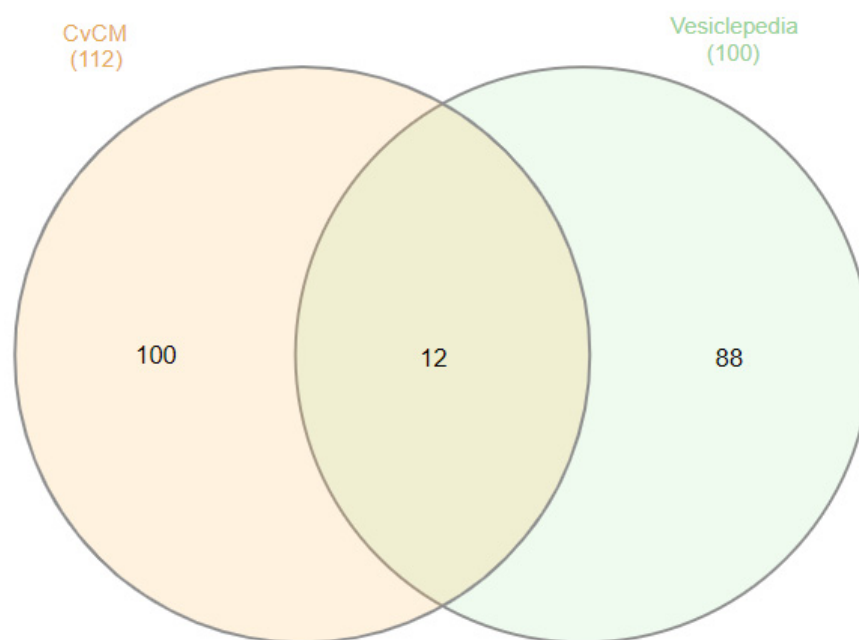

**Figure S2.** Ven diagram of proteins enriched in the Control EV group versus the conditioned media control compared to the top 100 Vesiclepedia EV markers [72].
